# Supplementary material
Source: HighWire-hosted journal article supplement (https://jnm.snmjournals.org/highwire/filestream/95115/field_highwire_adjunct_files/0/183475_Supplemental_Data.pdf)
Supplement: 183475_Supplemental_Data.pdf [file 183475_Supplemental_Data.pdf]

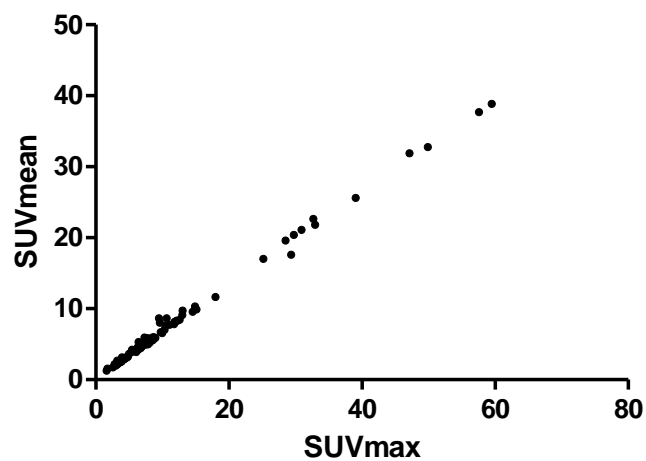

**Supplemental Figure 1.** Correlation between SUVmean and SUVmax of all evaluable tumor lesions at baseline ( $r = 0.99$ ,  $P < 0.0001$ ).

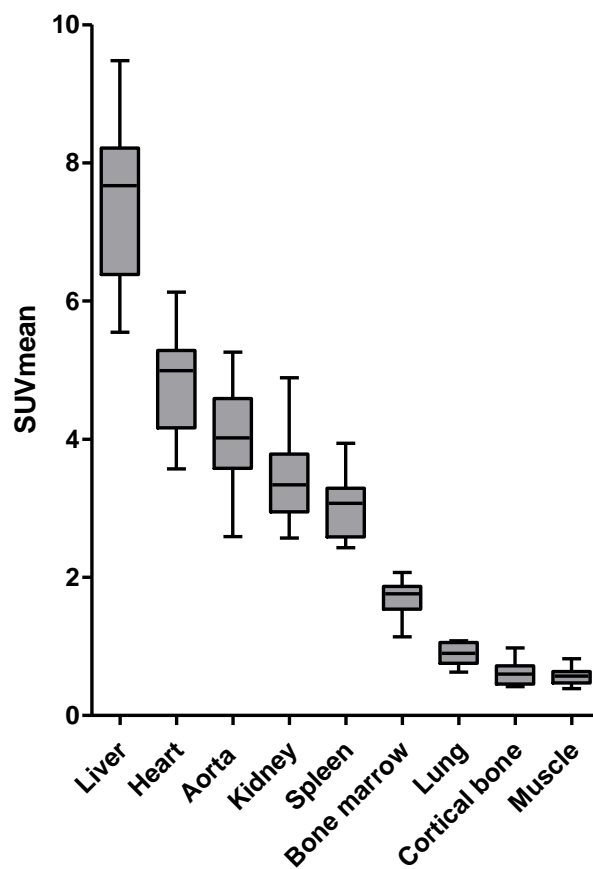

**Supplemental Figure 2.**  $^{89}\text{Zr}$ -bevacizumab uptake in healthy organs at baseline.

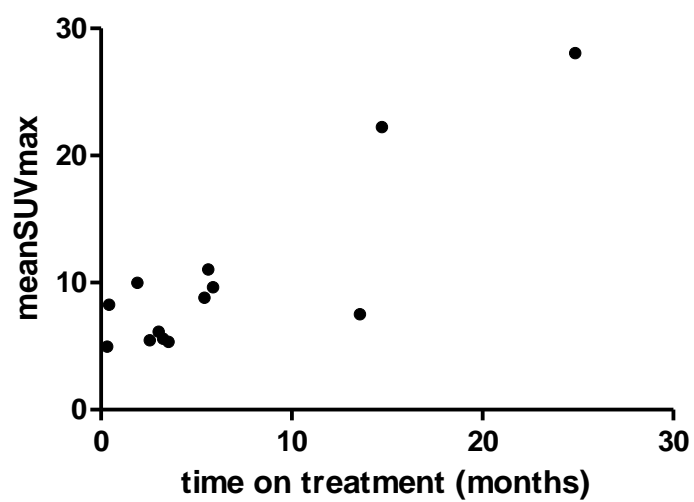

**Supplemental Figure 3.** Correlation between time on treatment and baseline tumor tracer uptake ( $r = 0.63$ ,  $P = 0.02$ ).
